# Supplementary material for: Discriminatory Ability and Clinical Utility of the AJCC7 and AJCC8 Staging Systems for Breast Cancer in a Middle-Income Setting
Source: MDPI journal article supplement (doi:10.3390/diagnostics13040674), 2023-02-10

**Supplementary materials:**

**Table S1:** Assessment of the proportional hazards assumption, where a value of less than 0.05 indicates the proportional hazards assumption is violated

| Variable         | AJCC7 model | AJCC8 model |
|------------------|-------------|-------------|
| AJCC7            | 0.72        | -           |
| AJCC8            | -           | 0.77        |
| Age at diagnosis | 0.26        | 0.22        |
| Centre           | 0.15        | 0.14        |
| Ethnicity        | 0.71        | 0.72        |
| Type of surgery  | 0.15        | 0.13        |
| Chemotherapy     | 0.62        | 0.64        |
| Radiotherapy     | 0.34        | 0.34        |
| Hormone therapy  | 0.14        | 0.11        |
| Targeted therapy | 0.90        | 0.88        |
| Overall          | 0.59        | 0.67        |

**Table S2:** 5-year overall survival rate by AJCC7 stage and AJCC8 stage

| Stage | AJCC7            | AJCC8            |
|-------|------------------|------------------|
| IA    | 0.97 (0.95-0.98) | 0.96 (0.95-0.97) |
| IB    | -                | 0.94 (0.92-0.96) |
| IIA   | 0.92 (0.91-0.94) | 0.89 (0.86-0.91) |
| IIB   | 0.88 (0.85-0.91) | 0.86 (0.81-0.92) |
| IIIA  | 0.88 (0.85-0.92) | 0.81 (0.76-0.86) |
| IIIB  | 0.65 (0.57-0.75) | 0.64 (0.58-0.72) |
| IIIC  | 0.66 (0.60-0.73) | 0.60 (0.51-0.70) |

Figure S1: Kaplan Meier survival curves for 5-year overall survival rate among up-staged, downstaged and unchanged patients (AJCC7 to AJCC8)

a: Original stage AJCC7 IA

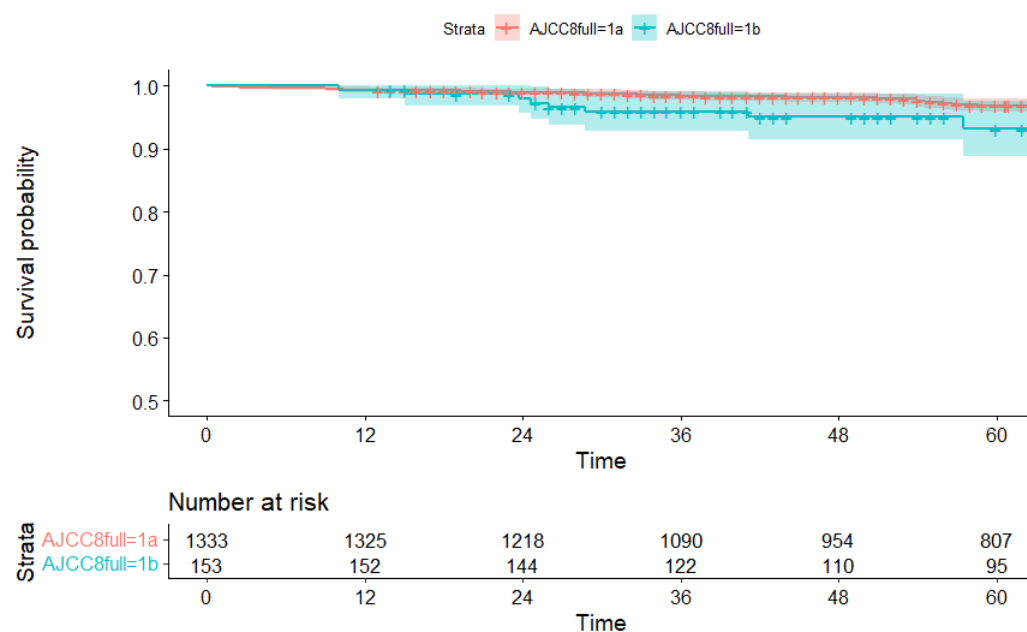

b: Original stage AJCC7 IIA

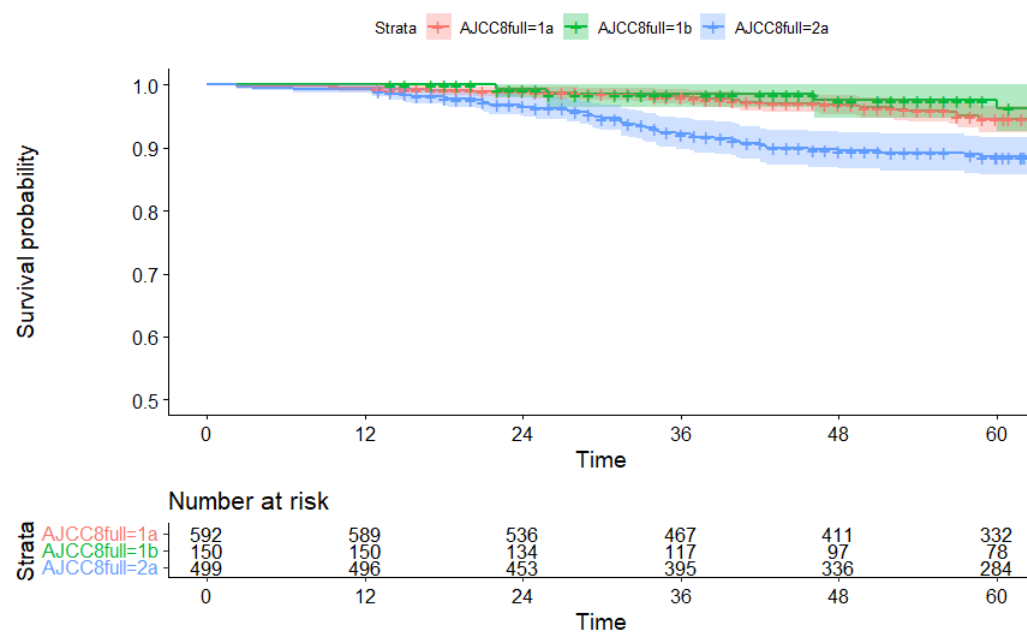

c: Original stage AJCC7 IIB

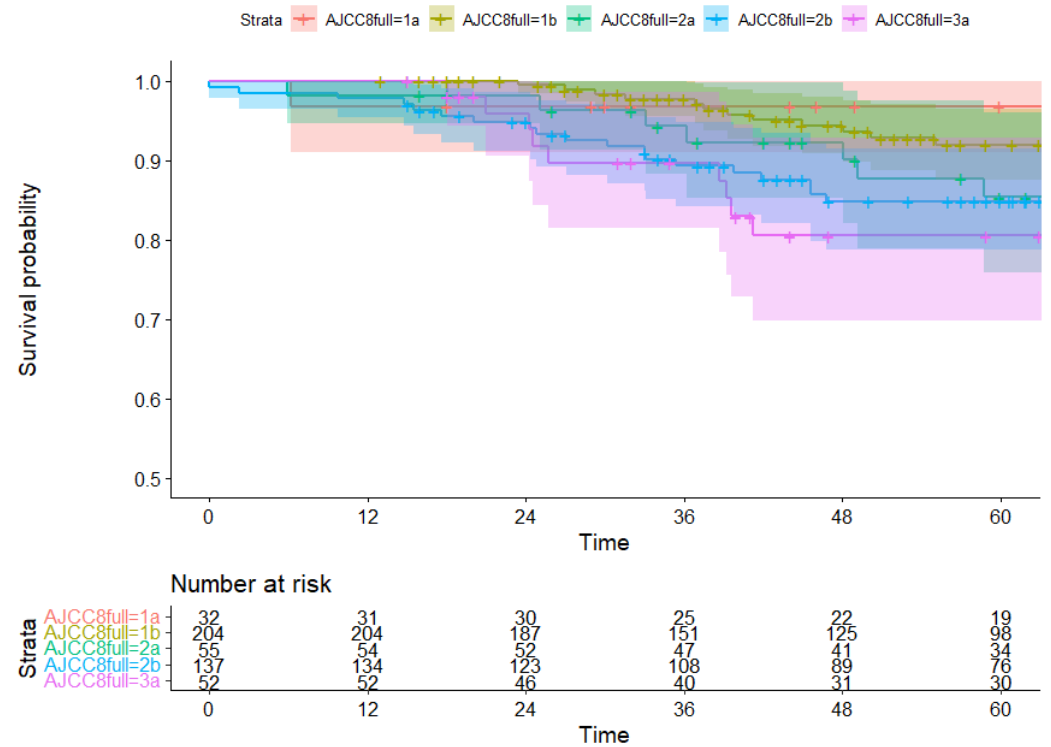

d: Original stage AJCC7 IIIA

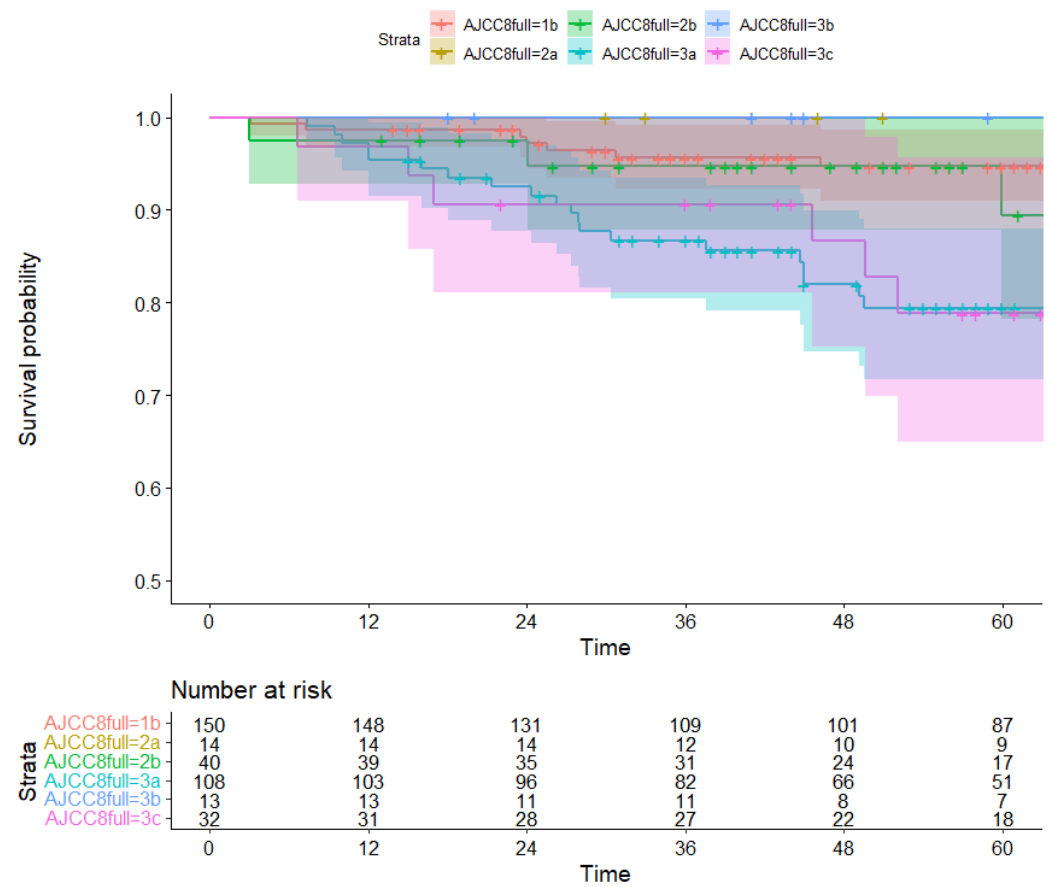

e: Original stage AJCC7 IIIB

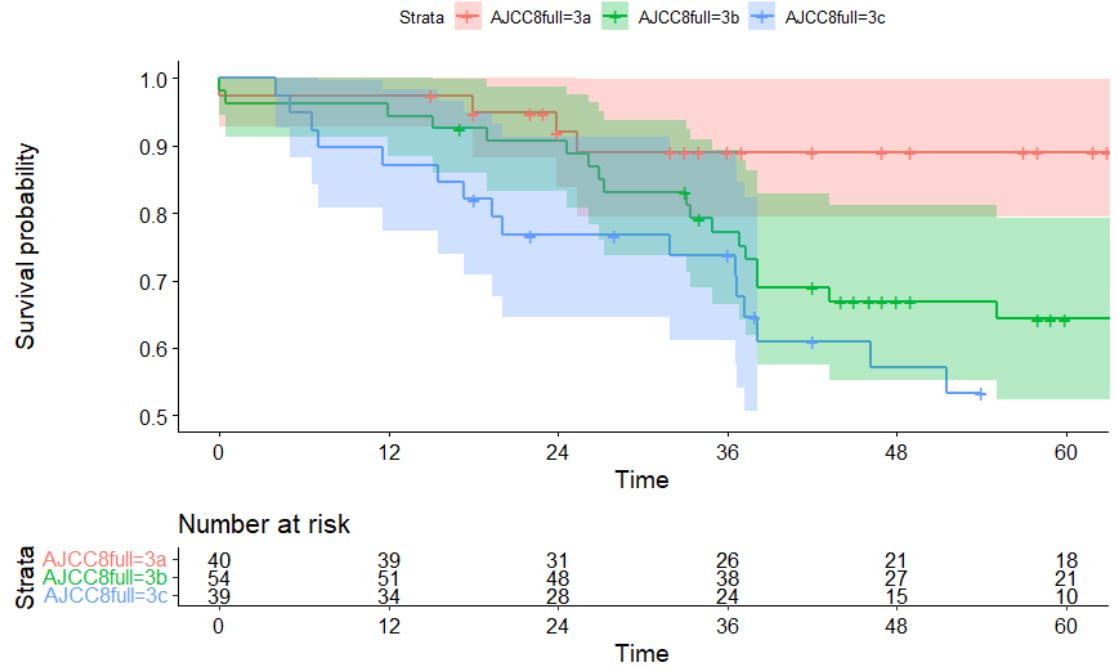

f: Original stage AJCC7 IIIC

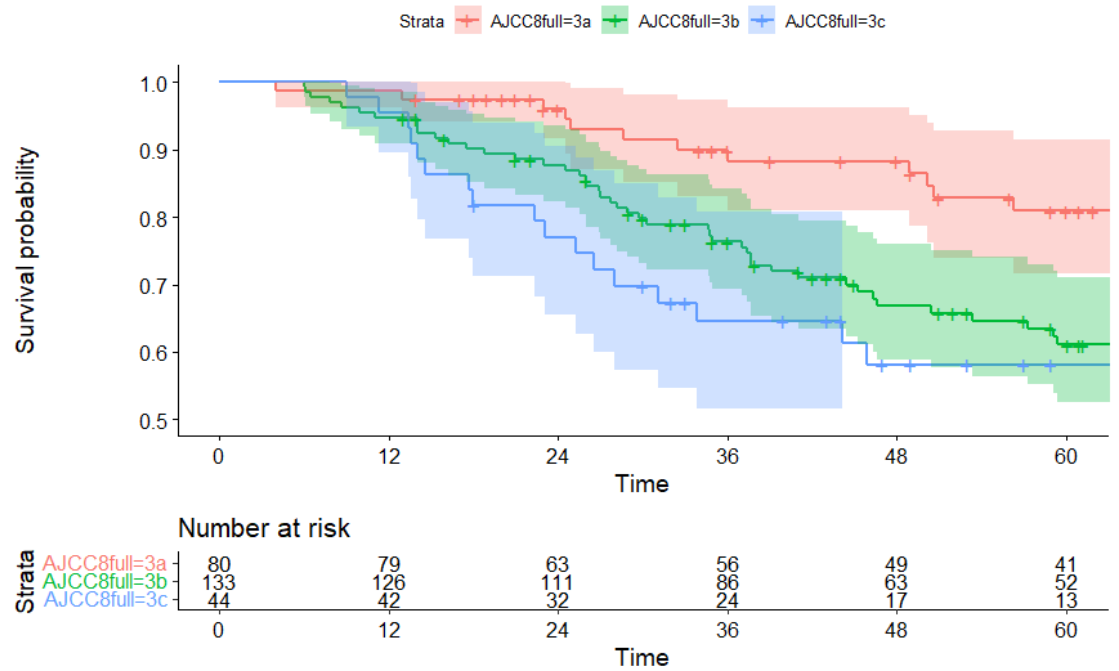

Supplement: s1 [file s1]
